# Supplementary material for: DNAJ heat shock protein family member C1 can regulate proliferation and migration in hepatocellular carcinoma
Source: PeerJ. 2023 Jul 26;11:e15700. doi: 10.7717/peerj.15700 (PMC10386825; doi:10.7717/peerj.15700)
Supplement: Supplemental Information 4 [file peerj-11-15700-s004.xlsx]

## Sheet: Sheet1
sex（1=male，2=female）	age	Child-Pugh stage	Barcelona stage	Tumor size/diameter（CM）/maximum	liver cirrhosis	virus hepatitis	Number of lesions (single, multiple)	Vascular invasion (1= yes, 0= no)	Satellite lesions (1= yes, 0= no)	lymphlymphatic metastasis	distant metastasis	Envelope (1= yes, 0= no)	prpre-operation AFP(400ug/L) (20ng/ml）	State of relapse	Relapse status (0= no relapse, 1= relapse)
1	44	A	BCLC-A	8.5*8*7.5cm	1	1	single	There was 1 MVI in the liver tissue near the cancer	0	Hilar lymph nodHilar lymph node is not large, portal vein without cancer thrombolus	no	1	36.5 ng/ml	relapserelapse	1
1	48	A	BCLC-C	20*17*9cm	1	1	multiple	1	1	0	0	1	>2000	weseer	0
1	48	A	BCLC-A	7cm*6cm*5.5cm	1	1	Polynodule fusion type	0	0	0	0	0	>2000	relapse	1
2	59	A	BCLC-A	3cm*2.6cm*2cm	1	1	multiple	0	0	0	0	0	372.38	weseer	0
1	61	A	BCLC-A	14cm*11cm*8.5cm	1	1	single	There were 3 MVI(M1) in the adjacent radiograph.	1	0	0	1	25.87
1	64	A	BCLC-B	5*4.5*4.5cm	1	2	multiple	2 MVI in adjacent liver tissue	0	0	0	1	23.54	relapse	1
1	55	C	BCLC-C	12cm*9.5cm*5cm	1	1	multiple	0	0	1	1	0	>2000
1	68	A	BCLC-A	5.5*5*4.5cm	0	0	single	0	0	0	0	1	normal
1	54	A	BCLC-C	10.5*9*9cm	1	1			0	0	0	1	57759.7 ng/ml	relapse	1
1	40	A	BCLC-B	3.5cm*3.5cm*3cm	1	1	multiple	There were 10 MVI and 7 suspended carcinomas in the adjacent liver	1	0	0	0	743	weseer	0
1	48	A	BCLC-A	2*1.5*1.5cm	1	1	multiple	0	0	0	0	1	-	weseer	0
1	57	A	BCLC-B	10cm*6cm*5cm	1	1	multiple	There were 2 MVI in the adjacent liver tissue, and 2 vessels contained suspended loose cancer cells (<50 cells/vessel).	0	0	0	The envelope is incomplete	2000	relapse	1
2	46	B	BCLC- B	3.5*3*2cm	1	1	multiple	0	0	0	0	1	52.6
2	49	A	BCLC-C	12cm*12cm*7cm	1	1	multiple	1	0	0	0	0	>2000
2	52	A	BCLC-C	10.5*8.5*8.5cm	1	1	single	There were 4 MVI in the adjacent liver tissue	0	0	0	1	>2000	weseer	0
1	65	A	BCLC-C	9*8*7.5cm	1	1	single	Multiple MVI (> 5) were seen in the paracancer liver, and 5 MVI and intravenous cancer thrombus were also seen in the distal paracancer liver	0	0	0	1	2357.3 ng/ml	relapse	1
1	54	A	BCLC-C	7cm*5cm*4.7cm	1	1	single	0	0	0	1	1	-	weseer	0
2	48	A	BCLC-C	9*8*8cm	no obvious abnormality	1	single	1	0	Cancer thrombus was formed in tCancer thrombus was formed in the right branch of the portal vein, but the thrombus head did not enter the main portal vein, and there was no enlargement of hepatic portal lymph nodes			1878	relapse	1
1	70	B	BCLC-C	7.5cm*5.6cm*3.2cm	1	1	single	There were 2 MVI near the cancer	1	0	0	1	>2000	weseer	0
